1 **Body size shifts influence effects of increasing temperatures on ectotherm metabolism**

2

3 \*Kristina Riemer

4 [kristina.riemer@weecology.org](mailto:kristina.riemer@weecology.org)

5 Department of Wildlife, Ecology, & Conservation

6 University of Florida

7 Gainesville, FL, 32611

8

9 Kristina J. Anderson-Teixeira

10 [teixeirak@si.edu](mailto:teixeirak@si.edu)

11 Conservation Ecology Center, Smithsonian Conservation Biology Institute

12 1500 Remount Rd.

13 Front Royal, VA 22630 USA

14 and

15 Center for Tropical Forest Science, Smithsonian Tropical Research Institute

16 Panama City, PANAMA

17

18 Felisa A. Smith

19 [fasmith@unm.edu](mailto:fasmith@unm.edu)

20 Department of Biology

21 167 Castetter Hall

22 University of New Mexico

23 Albuquerque, NM

24

25 David J. Harris

26 [dave@Harris-research.me](mailto:dave@Harris-research.me)

27 Department of Wildlife, Ecology, & Conservation

28 University of Florida

29 Gainesville, FL, 32611

30

31 S.K. Morgan Ernest

32 [skmorgane@ufl.edu](mailto:skmorgane@ufl.edu)

33 Department of Wildlife, Ecology, & Conservation

34 University of Florida

35 Gainesville, FL, 32611

36

37 Key words: Metabolic rate, ectotherms, warming temperatures, indirect effects, body size,  
38 metabolic theory of ecology, physiology

39

40 Running title: Indirect effect of temperature on ectotherm metabolism

41

42 Number of words (abstract): 299

43 Number of words (main body): 4,195

44 Number of references: 55

45

46 \*corresponding author

## 47 INTRODUCTION

48

49 Environmental temperature influences organisms in many ways; temperature increases or  
50 decreases rates of physiological processes (Brown et al., 2012), determines timing of  
51 reproduction (Olive, 1995), and even directly affects mortality (Pauly, 1980). Because of the far-  
52 reaching influence of temperature, projected increases in global temperatures due to climate  
53 change are expected to substantially alter diverse species characteristics. Increased temperatures  
54 have already been implicated in shifts in species geographic distributions (e.g., Buckley et al.,  
55 2010), and in the phenology of species' life history and development (e.g., Wolkovich et al.,  
56 2012).

57 It is predicted that global warming will also increase metabolic rates of ectotherms  
58 (Seebacher et al., 2015; Dillon et al., 2010). Metabolic rate is a key physiological process that  
59 represents the rate of energy required for the maintenance, growth, and reproduction of  
60 organisms. Temperature influences metabolic rates in ectotherms through its influence on the  
61 kinetic energy available for chemical reaction. Because the relationship between temperature and  
62 metabolic rate is positive and exponential until an upper temperature threshold, small changes in  
63 temperature can have substantial impacts on metabolic rate (Gillooly et al., 2001). By directly  
64 increasing ectotherm metabolic rates, warmer temperatures would have considerable impacts on  
65 the ecology of communities and ecosystems (Anderson-Teixeira et al., 2012; Lemoine &  
66 Burkepile, 2012; O'Connor et al., 2011; Rall et al., 2010). Changes in metabolic rate affect many  
67 aspects of organismal biology and ecology, including individual fitness (Burton et al., 2011),  
68 population dynamics (Buckley et al., 2014), community composition (Marquet et al., 2004), and  
69 even ecosystem processes such as ecosystem respiration and nutrient cycling (Gilbert et al.,

70 2014; McIntyre et al., 2008). Therefore, understanding the impact of temperature increases on  
71 metabolic rates is critical to determining how ectotherm organisms, and the ecological  
72 communities in which they perform key roles, will response to climate change.

73         While the direct effect of temperature on ectotherm metabolic rates is well-known,  
74 temperature also affects other aspects of organismal biology which in turn influence metabolic  
75 rate. One such organismal characteristic that influences metabolic rate and is influenced by  
76 temperature is body size. Temperature affects body size, a phenomenon often referred to as the  
77 size-temperature rule in which ectothermic individuals commonly develop to a smaller adult size  
78 when raised at higher temperatures (Forster et al., 2011a; Angilletta, 2004; Atkinson, 1994). This  
79 shift in adult size occurs quickly, with individual body size often responding to temperature  
80 change after a single generation (e.g., fruit flies in Partridge et al., 1994). Smaller ectotherms  
81 then have decreased metabolic rate due to the positive allometric relationship between body size  
82 and metabolic rate (Kleiber, 1932; West et al., 1997; Brown et al., 2004). Thus, in addition to its  
83 direct effect on metabolic rate, temperature influences metabolic rate indirectly via body size  
84 shifts.

85         Predictions of ectothermic metabolic response to warming temperatures have focused on  
86 the direct effect of temperature on metabolic rate while neglecting the indirect effects from size  
87 shifts (Dillon et al., 2010). This occurs even though the relationships between temperature and  
88 metabolic rate, size and metabolic rate (Gillooly et al., 2001; Brown et al., 2004), and  
89 temperature and size (Walters & Hassall, 2006) are well documented. Indirect effects often  
90 emerge in ecology because ecological systems are complex systems composed of multiple, and  
91 sometimes antagonistic, interactions. These indirect effects can be strong enough to modify  
92 outcomes, rendering predictions that only consider direct interactions incorrect (e.g., apparent

93 competition in Holt, 1977). While warmer temperatures from climate change will directly result  
94 in increased metabolic rates, this increase could be offset by a decrease in metabolic rates due to  
95 the concurrent indirect effect of smaller body size.

96 Here we examine how predictions of ectotherm metabolic rates differ when the indirect  
97 effect of increased global temperatures on size is included in addition to the direct effect. While  
98 higher temperatures cause metabolic rates to increase when size is constant (i.e., direct effect),  
99 this increase could be dampened when size is allowed to vary (i.e., indirect effect) consistent  
100 with empirical data, if not result in an overall decreased metabolic rate. To estimate how much  
101 size changes in response to temperature, we collect experimental data on observed ectothermic  
102 size shifts in response to temperature changes. We then use a previously established model that  
103 integrates size and temperature effects on metabolic rate to estimate metabolic rates when size is  
104 constant and when size varies. We compare these metabolic rates to determine how this  
105 established indirect effect of increased temperature alters the magnitude and direction of existing  
106 predictions that use only the direct effect.

107

## 108 **METHODS**

109

### 110 **Data**

111 We used data from published experimental studies that raised individuals of ectotherm  
112 species at constant temperatures. From these studies, we obtained average adult size of all  
113 individuals grown at each temperature treatment. Criteria for inclusion were that (1) in each  
114 study individuals were raised at a minimum of two experimental temperatures, (2) individuals  
115 were either lab-bred or collected at an early life stage, and (3) sufficient food was provided so

116 that resource limitation did not influence ontogenetic growth. These criteria were laid out by  
117 Forster et al. (2011a), which was also the source of most of our data, and we collected some  
118 additional data from the literature that also conformed to these criteria (Coker, 1993; Berven,  
119 1982; Stacey & Fellowes, 2002; Marti & Carpenter, 2008; Oetken et al., 2009). Some studies had  
120 multiple trials to compare responses of individuals from different latitudes or elevations; we  
121 retained data for all trials and they were kept separate for the analysis. If length was the only size  
122 metric provided, we converted it to mass using allometric relationships (Appendix S1 in  
123 Supporting Information).

124 Studies examined body size response to temperature across a range of temperatures ( $2^{\circ}\text{C}$   
125  $- 36^{\circ}\text{C}$ ) that differed from each other by various temperature increments ( $1^{\circ}\text{C} - 29^{\circ}\text{C}$  difference  
126 in temperature between experiments within studies). To simplify this analysis and focus on our  
127 core question of whether the indirect temperature effect on body size could, on average, offset or  
128 substantively ameliorate the direct effect of temperature on metabolic rate, we further filtered  
129 this data by only considering pairs of experiments within a study that differed by  $3^{\circ}\text{C}$  in  
130 experimental temperature. We chose  $3^{\circ}\text{C}$  as our temperature difference because it is within the  
131 bounds of predicted future temperature change from climate models, though particular species  
132 may or may not experience this specific temperature increase in their native ranges. From each  
133  $3^{\circ}\text{C}$  experimental pair, we considered the mass value associated with the lower temperature to  
134 represent that species' mass before temperature increase while mass value reported for the higher  
135 temperature represented size response to a  $3^{\circ}\text{C}$  increase in temperature. Some studies had  
136 multiple experimental pairs whose experimental temperatures differed by  $3^{\circ}\text{C}$  (i.e., one pair of  
137  $15^{\circ}\text{C}$  and  $18^{\circ}\text{C}$ , and a second pair of  $18^{\circ}\text{C}$  and  $21^{\circ}\text{C}$ ); in these cases we kept all  $3^{\circ}\text{C}$  pairs. This  
138 filtered subset of the data had temperature ranges of  $3^{\circ}\text{C}$  to  $30^{\circ}\text{C}$  for the lower temperature and

139 6°C to 33°C for the higher temperature.

140 The final dataset contained 191 pairs of average adult masses for 45 species across 40  
141 studies. This dataset includes species from seven taxonomic classes, ranging from Insecta to  
142 Amphibia, and terrestrial species from every continent except Antarctica and aquatic species  
143 from every ocean and many large bodies of water. Most species are very small (<100 mg)  
144 invertebrates because available data for larger ectotherms was limited. Mass values span five  
145 orders of magnitude, from 2 µg to 100 mg. Data and code have been deposited in the online  
146 Dryad Data Repository (<http://datadryad.org>).

147

#### 148 **Metabolic rates**

149 Size-temperature studies do not typically measure metabolic rate. Therefore, we used a  
150 model to calculate species' metabolic rates from the experimental temperature-mass dataset. This  
151 model is central to the metabolic theory of ecology (MTE) (Brown et al., 2004) and combines  
152 both mass and temperature effects on metabolic rates:

153

$$154 R = r_0 M^b e^{-E/kT}$$

155

156 where  $R$  = metabolic rate,  $r_0$  = scaling constant,  $M$  = mass (g),  $b$  = unitless scaling exponent,  $E$  =  
157 activation energy of respiration (eV),  $k$  = Boltzmann's constant ( $8.617 \times 10^{-5}$  eV/K), and  $T$  =  
158 temperature (K). Though the mechanism underlying the MTE equation has been questioned  
159 (O'Connor et al., 2007), it provides a reasonable empirical approximation across a wide range of  
160 taxa (Gillooly et al., 2001) and has been used previously to estimate metabolic rates response to  
161 temperature change (e.g., Dillon et al., 2010). An advantage of this equation for our study is that

162 it allows us to incorporate both the direct effect of temperature on metabolic rate ( $e^{-E/kT}$ ) and the  
163 indirect effect through organismal size ( $M^b$ ).

164 We used values of  $b$  and  $E$  specific to each taxonomic class to allow for taxon-specific  
165 responses of metabolism to temperature. Because availability of class-specific  $b$  and  $E$  values  
166 varied widely among the classes, we used different approaches for determining these values.  
167 When data on organismal metabolic rate available for a class also contained size and temperature  
168 information (Branchiopoda, Amphibia, Malacostraca, Maxillopoda; Makarieva et al., 2008;  
169 White et al., 2012), we used a multiple regression method (White et al., 2012) to calculate  $b$  and  
170  $E$ . Values for Actinopterygii were estimated using fish species from several classes (Gillooly et  
171 al., 2001) and values for Insecta were acquired from literature sources (Chown et al., 2007; Irlich  
172 et al., 2009), while the average values of  $b = 0.75$  and  $E = 0.63$  eV (Brown et al., 2004) were  
173 used for Entognatha, the most data-limited class. Data used to calculate  $b$  and  $E$  were non-  
174 overlapping with our experimental temperature-mass dataset.

175 For each species, we used the MTE equation to calculate how much metabolic rate  
176 changed due to only the direct effect of temperature increase, and from both the direct effect of  
177 temperature and indirect effect of the empirical body size response to temperature. To do so, we  
178 calculated three metabolic rates for each 3°C experimental pair in the temperature-size dataset  
179 (Fig. 1A):

- 180 i. “Starting metabolic rate” represents the metabolic rate prior to temperature increase, and  
181 was calculated using size and temperature data from the lower temperature experiment of  
182 each pair.
- 183 ii. “Constant size metabolic rate” is the hypothetical metabolic rate including only the direct  
184 effect of temperature increase. It was calculated with the size from the lower temperature

185 of each experimental pair, and temperature from the higher temperature of each pair (i.e.,  
186 the assumption that size at the lower temperature does not change as temperature  
187 increases).

188 iii. “Varying size metabolic rate” represents the empirical metabolic rate that includes both  
189 the direct and indirect effects of temperature increase. It was calculated using both size  
190 and temperature data from the higher temperature of each pair.

191

### 192 *Comparison*

193 To visualize the difference between the metabolic predictions including only the direct  
194 effect of temperature versus including both the direct and indirect effects of temperature, we  
195 examined how much varying size metabolic rate increased from initial compared to constant size  
196 metabolic rate. Because some species had data from multiple 3°C experimental pairs, we  
197 condensed the data by calculating species averages for starting metabolic rate, constant  
198 metabolic rate, and varying size metabolic rate (Fig. 1A). We used these average values to  
199 calculate i) “constant size metabolic rate change”: the percent change from starting metabolic  
200 rate to constant size metabolic rate and ii) “varying size metabolic rate change”: the percent  
201 change from starting metabolic rate to varying size metabolic rate. These two change metrics  
202 represent how much metabolic rate changes due to only the direct effect of temperature increase  
203 (i.e., constant size metabolic rate change), and when the indirect effect of temperature, in  
204 addition to the direct effect, is included (i.e., varying size metabolic rate change). Positive  
205 percent change showed an increase in metabolic rate from starting metabolic rate for each  
206 species. To assess the difference between metabolic rates with and without the indirect effect,  
207 each species' constant size and varying size metabolic rates were log-transformed and compared



208 across species with a paired t-test.

209

210 *Linear mixed model*

211 We used a mixed model to determine if other factors, besides the body size response,  
212 impacted the difference between constant size and varying size metabolic rates. The response  
213 variable for the model was the log of the ratio between each pair's constant size and varying size  
214 metabolic rates, where a positive log-ratio indicated that the pair's varying size metabolic rate  
215 was smaller than its constant size metabolic rate. In addition to the model results, likelihood ratio  
216 tests were used to determine each effect's significance. We included absolute temperature, as  
217 represented by the lower temperature for each pair, as a fixed effect because higher starting  
218 temperatures are expected to have a disproportionate effect on metabolic rates due to their  
219 exponential relationship. The random effects in the model were the taxonomic classifications of  
220 species and class, as metabolic rate varies amongst these groupings due to biology and ecology.  
221 We initially included study and trial as random effects, to take into account differences in  
222 experimental setups, but these were not included in the final model because their maximum  
223 likelihood estimates for variance were near zero and they therefore had no impact on the final  
224 model. Similarly, because metabolic rate depends on the relative size of organisms, we included  
225 mass from the lower temperature of each pair as a fixed effect but it was removed because it did  
226 not have a substantial effect on the metabolic rate log-ratio ( $\chi^2 = 0.7015$ ;  $df = 1$ ;  $p = 0.4$ ). We ran  
227 the linear mixed model using the R package lme4 version 1.1.9 (Bates et al., 2015; Winter,  
228 2013).

229

230 **Compensation mass**

231 We assessed the magnitude of size response to temperature needed to offset the direct  
232 effect of temperature on metabolic rate, and how close each species' observed size response to  
233 temperature came to reaching this predicted value (Fig. 1B). To calculate the predicted size  
234 necessary to offset the 3°C increase in temperature for an experimental pair ( $M_N$ ), we rearranged  
235 the MTE equation to solve for size:

236

$$237 \quad M_N = (R / e^{-E/kT})^{1/b}$$

238

239 where R is the starting metabolic rate and T is the observed temperature from the higher  
240 temperature experiment for each pair. Thus, needed mass ( $M_N$ ) is the mass a species would have  
241 to be under higher temperature conditions in order for metabolic rate to not change.

242 We calculated how much each species' size actually changed with increased temperature,  
243 (“observed mass change” = percent change from initial mass to actual mass), and how much size  
244 theoretically needed to change to maintain metabolic rate with increased temperature  
245 (“compensation mass change” = percent change from initial mass to needed mass) (Fig. 1B).  
246 Observed mass changes or compensation mass changes of less than 100% indicated that the mass  
247 of a species either did or needed to decrease, respectively. A paired t-test was used to compare  
248 log-normalized actual and needed mass values. All analyses were completed using R version  
249 3.3.1 (R Core Team, 2016).

250

## 251 **RESULTS**

252

### 253 **Metabolic rates comparison**

254 Metabolic rates differed when the indirect effect of temperature increase was included  
255 with the direct effect. All varying size metabolic rate changes, which included the indirect effect  
256 of temperature on size, were positive (average percent change = 23%; Fig. 2), indicating that  
257 ectotherm metabolic rate will still increase with temperature despite decreases in body size.  
258 However, most species' metabolic rates did not increase as much when the indirect effect was  
259 included, as shown by smaller varying size metabolic rate changes than constant size metabolic  
260 rate changes (Fig. 2). There was also a statistically significant difference between these  
261 metabolic rate changes, with varying size metabolic rate being consistently smaller than constant  
262 size ( $t_{44} = 3.34$ ;  $p = 0.002$ ; 95% CI = 0.017 – 0.070). While the majority of species had a smaller  
263 increase in metabolic rate with the body size response included, for 9 of the 45 species  
264 incorporating size shifts actually caused metabolic rate to increase even more than expected from  
265 just the direct effect of temperature.

266

### 267 **Linear mixed model**

268 Similarly, most pairs had smaller varying size metabolic rates than constant size  
269 metabolic rates. Of 191 pairs, 82% had positive log-ratios, which represent the difference  
270 between constant size and varying size metabolic rates. These log-ratios were not explained by  
271 the three factors of interest we included in the model. While absolute temperature ( $\chi^2 = 9.27$ ;  $df =$   
272  $1$ ;  $p = 0.002$ ), taxonomic class ( $\chi^2 = 3.90$ ;  $df = 1$ ;  $p = 0.048$ ), and taxonomic species ( $\chi^2 = 5.48$ ;  $df$   
273  $= 1$ ;  $p = 0.019$ ) did influence the differences between metabolic rates, they were not sufficiently  
274 biologically significant. With increasing absolute temperature, varying size metabolic rate tended  
275 to get increasingly smaller than constant size metabolic rate, as shown by a slightly positive  
276 slope in the relationship between absolute temperature and log-ratio (slope =  $0.004 \pm 0.001$ ).

277 However, this increasing difference had minimal biological relevance because it was between  
278 one and two orders of magnitude smaller than the actual difference between metabolic rates.  
279 Similarly, species classification explained only 17% of the variability in random effects, while  
280 class explained a more substantial 43% of random effects variability (Fig. 2).

281

## 282 **Compensation mass**

283 No species' mass decreased enough for their metabolic rate to remain constant regardless  
284 of temperature increase. To retain constant metabolic rates, all species would need to get smaller  
285 (Fig. 3). Actual mass (i.e., empirical mass in response to temperature increase) and needed mass  
286 (i.e., theoretical mass required in order for metabolic rate to not change due to temperature  
287 increase) were statistically significantly different, with needed masses smaller than actual masses  
288 ( $t_{44} = 17.707$ ;  $p < 2.2 \times 10^{-16}$ ;  $CI = 0.25 - 0.32$ ). While most species empirically decreased in size,  
289 20% of species actually increased in size in response to temperature increase (observed mass  
290 change mean  $\pm$  standard deviation:  $-4\% \pm 11\%$ ). These were the same species that had a greater  
291 increase in metabolic rate when the body size response was included (Fig. 2).

292

## 293 **DISCUSSION**

294

295 Consistent with expectations, predictions of most species' metabolic rates were smaller  
296 when the indirect effect of temperature was included with the direct effect. While all metabolic  
297 rates increased with increased temperatures whether or not the indirect effect was included,  
298 incorporating the body size response to temperature significantly dampened the increase in  
299 metabolic rate for most species (Fig. 2). Species decreased in size by up to 20% (Fig. 3). Though

300 there is no accepted quantitative description of the relationship between temperature and size for  
301 ectotherms (Forster et al., 2011b), the magnitude of size decrease by these species was similar to  
302 results from previous studies. For example, worm species *Caenorhabditis elegans* was 6%  
303 smaller when raised at a temperature increase of 5°C (Voorhies, 1996) and two mayfly species  
304 *Ameletus ludens* and *Ephemerella subvaria* were 6% and 26% smaller, respectively, at a 3.1°C  
305 warmer temperature (Sweeney & Vannote, 1978). None of the species in this study decreased  
306 sufficiently in size for the indirect effect of temperature to offset the direct effect. All species  
307 would have needed to decrease between 15% and 35% in size for their metabolic rates to remain  
308 constant with temperature increase (Fig. 3).

309 A small proportion of species increased in size, instead of decreasing as expected, in  
310 response to increased temperature. Of 36 species, 9 species increased in size (Fig. 3) and  
311 therefore had a greater increase in metabolic rate when the indirect effect of temperature was  
312 included (Fig. 2). These included four crustacean species from two classes (*Artemia salina*,  
313 *Farfantepenaeus californiensis*, *Hyas coarctus*, *Pandalus borealis*) and insect species including  
314 two butterfly species (*Aglais urticae*, *Polygonia c-album*), two out of 11 fruit fly species  
315 (*Drosophila equinoxialis*, *Drosophila subobscura*), and one crop pest (*Ptero alternus*). This  
316 opposing size response is consistent with previous research as, for example, 12% of the studies  
317 in the meta-analysis by Atkinson (1994) showed a positive relationship between temperature and  
318 size. While it is unknown why some species exhibit this opposing response, many explanations  
319 have been proposed based on growth rates (Angilletta & Dunham, 2003; Walters & Hassall,  
320 2006), abiotic conditions (Atkinson, 1994), extreme temperatures (Kingsolver & Huey, 2008),  
321 and life history characteristics (Walters & Hassall, 2006; Forster et al., 2012). Regardless of the  
322 mechanism, these anomalous species will have relatively greater metabolic rates and body sizes

323 from increased temperatures, with the accompanying higher energy requirements. Their greater  
324 use of space, food, and other resources could result in disproportionately greater ecological  
325 impacts and ecological mismatches, such as substantial changes in prey abundances due to  
326 increased consumption by predators (Rall et al., 2010).

327         Though there was a significant difference in species metabolic rates when the indirect  
328 effect of temperature was included, the biological relevance of this difference is unknown.  
329 Including the indirect effect of temperature on size generally resulted in small changes in the  
330 predicted metabolic rate. Species that declined in size with increasing temperature experienced,  
331 on average, a 9% reduction in the predicted metabolic rate increase, while those that increased in  
332 size saw an average 11% increase in metabolic rate from that expected due to the direct effect of  
333 temperature alone. This magnitude of difference in metabolic rate seems relatively small, but its  
334 ecological relevance could depend on context. For example, Gilbert et al. (2014) showed that  
335 small changes in biomass potential resulted in large and unpredictable fluctuations in food web  
336 stability but only when biomass potential was low. Thus, whether or not these small changes in  
337 expected metabolic rates due to the size response to increasing temperature will have cascading  
338 effects on the ecology of those species or the communities they inhabit may depend on the  
339 productivity of the system and their trophic interactions. Further work would be needed to  
340 determine if there is an ecological impact due to the difference in metabolic rate caused by the  
341 body size response.

342         Because none of the species in this study decreased enough in size to offset the expected  
343 direct effect of temperature on metabolic rate, increasing metabolic rates is still likely to be a  
344 widespread response of ectotherms to warming. The overall increase in ectotherm metabolic  
345 rates will have substantial consequences for every aspect of ecological systems, from population-

346 level and up (Schmidt-Nielsen, 1984; Anderson-Teixeira et al., 2012). Individuals of each species  
347 will require more energy to maintain normal maintenance, growth, and reproductive function and  
348 therefore use a greater proportion of resources. Assuming resource availability remains the same,  
349 this will increase intraspecific competition, resulting in lower species abundances and higher  
350 extinction probabilities (MacArthur & Wilson, 1963; Hurlbert & Stegen, 2014) that will shift  
351 community composition, potentially changing the dominant species, trophic structure, and  
352 interspecific interactions. This would ultimately affect ecosystem-level energy fluxes (Allen et  
353 al., 2005; Yvon-Durocher & Allen, 2012). Like metabolic rate, size itself impacts many aspects  
354 of population, community, and ecosystem ecology (e.g., cascading effects on foraging and  
355 interspecific competition in woodrats in Smith et al., 1998) independently of its impact through  
356 metabolic rate. The shifts in size that ectotherms may experience with warming are likely to  
357 compound many of these cascading impacts as well. Incorporating the effects of temperature  
358 change through its coordinated impacts on metabolism and size will be challenging, but previous  
359 work on changing body size (Woodward et al., 2005; Ohlberger, 2013) is a potential guide.  
360 Particularly informative is an extensive study by O'Gorman et al. (2012) which showed  
361 significant effects of body size on individuals, populations, communities, and ecosystem  
362 processes in Icelandic streams with a temperature gradient.

363         Understanding how climate change will impact species and ecosystems is difficult  
364 because ecological systems are complex. Temperature does not impact one aspect of ecology, but  
365 influences dynamics at almost every level, from the physiology of organisms to the rates of  
366 ecosystem fluxes. We often reduce this complexity by studying the direct effects of temperature  
367 change on some particular component of ecology, such as the effect on metabolic rate, and then  
368 sometimes additionally the direct effect of the changed ecological component on some other

369 ecological process. Our results highlight the need to consider the coordinated impact of multiple  
370 pathways of effects when making predictions about how species will respond to climate change.  
371 While we focused here on the body size response of ectotherms to temperature as an indirect  
372 effect on metabolic rate, this is by no means the only indirect pathway by which temperature can  
373 impact metabolic rate. Temperature can impact size through a variety of other environmental  
374 pathways besides the temperature-size response, including through resource availability, which  
375 could then consequently affect body size in various ways (McNab, 2010; Bickford et al., 2011).  
376 Designing studies to assess the relative importance of direct and indirect effects of temperature  
377 on species, communities, and ecosystem properties of interest is an important next step for our  
378 ability to predict the impacts of climate change.

379

## 380 **ACKNOWLEDGEMENTS**

381 This research was supported by the Gordon and Betty Moore Foundation Data-Driven Discovery  
382 Grant and the NSF CAREER grant, both to Ethan White. Thanks to Ellen Bledsoe for feedback  
383 on data visualization.

384

## 385 **SUPPLEMENTARY MATERIALS LIST**

386 **Appendix S1** Methods for converting non-mass measurements to mass

387

## 388 **DATA ACCESSIBILITY**

389 All temperature-mass data, along with associated cleaning and analysis R scripts, are available  
390 on Dryad.

391



392 **BIOSKETCH**

393 The Weecology group, in conjunction with collaborators, works on diverse ecological questions  
394 by linking empirical and quantitative approaches, with a focus on macroecology and  
395 computational techniques.

396 Author contributions: K.A.T., F.S., and S.K.M.E conceived the project and collected data, K.R.,  
397 D.J.H., and S.K.M.E. analyzed data, and K.R. and S.K.M.E. primarily completed the writing  
398 with contributions from all co-authors.

399

400 **REFERENCES**

401

402 Allen, A.P., Gillooly, J.F. & Brown, J.H. (2005) Linking the global carbon cycle to individual  
403 metabolism. *Functional Ecology*, 19, 202–213.

404 Anderson-Teixeira, K.J., Smith, F.A. & Ernest, S.K.M. (2012) *Climate Change. Metabolic*  
405 *Ecology: A Scaling Approach* (ed. by R.M. Sibly, J.H. Brown, and A. Kodric-Brown), pp.  
406 280–292. Wiley-Blackwell, Chichester.

407 Angilletta, M.J. & Dunham, A.E. (2003) The temperature-size rule in ectotherms: Simple  
408 evolutionary explanations may not be general. *American Naturalist*, **162**, 332–342.

409 Angilletta, M. (2004) Temperature, growth rate, and body size in ectotherms: fitting pieces of a  
410 life-history puzzle. *Integrative and Comparative Biology*, **509**, 498–509.

411 Atkinson, D. (1994) Temperature and organism size: a biological law for ectotherms? *Advances*  
412 *in Ecological Research*, **25**, 1–58.

413 Bates, D., Maechler, M., Bolker, B. & Walker, S. (2015) Fitting Linear Mixed-Effects Models  
414 Using lme4. *Journal of Statistical Software*, **67**, 1–48.

415 Berven, K.A. (1982) The genetic basis of altitudinal variation in the wood frog *Rana sylvatica* II.  
416 An experimental analysis of larval development. *Oecologia*, **52**, 360–369.

417 Bickford, D.P., Sheridan, J. a. & Howard, S.D. (2011) Climate change responses: Forgetting  
418 frogs, ferns and flies? *Trends in Ecology and Evolution*, **26**, 553–554.

419 Brown, J.H., Gillooly, J.F., Allen, A.P., Savage, V.M. & West, G.B. (2004) Toward a metabolic  
420 theory of ecology. *Ecology*, **85**, 1771–1789.

421 Brown, J.H., Sibly, R.M. & Kodric-Brown, A. (2012) *Introduction: Metabolism as the Basis for*  
422 *a Theoretical Unification of Ecology. Metabolic Ecology: A Scaling Approach* (ed. by R.M.  
423 Sibly), J.H. Brown), and A. Kodric-Brown), pp. 1–6. Wiley-Blackwell, Chichester.

424 Buckley, L.B., Urban, M.C., Angilletta, M.J., Crozier, L.G., Rissler, L.J. & Sears, M.W. (2010)  
425 Can mechanism inform species' distribution models? *Ecology Letters*, **13**, 1041–54.

- 426 Buckley, L.B., Nufio, C.R. & Kingsolver, J.G. (2014) Phenotypic clines, energy balances and  
427 ecological responses to climate change. *Journal of Animal Ecology*, **83**, 41–50.
- 428 Burton, T., Killen, S.S., Armstrong, J.D. & Metcalfe, N.B. (2011) What causes intraspecific  
429 variation in resting metabolic rate and what are its ecological consequences? *Biological*  
430 *Sciences*, **278**, 3465–3473.
- 431 Chown, S.L., Marais, E., Terblanche, J.S., Klok, C.J., Lighton, J.R.B. & Blackburn, T.M. (2007)  
432 Scaling of insect metabolic rate is inconsistent with the nutrient supply network model.  
433 *Functional Ecology*, **21**, 282–290.
- 434 Coker, R.E. (1933) Influence of Temperature on Size of Freshwater Copepods (Cyclops).  
435 *International Review of Hydrobiology*, **29**, 406–436.
- 436 Dillon, M.E., Wang, G. & Huey, R.B. (2010) Global metabolic impacts of recent climate  
437 warming. *Nature*, **467**, 704–6.
- 438 Forster, J., Hirst, A.G. & Atkinson, D. (2012) Warming-induced reductions in body size are  
439 greater in aquatic than terrestrial species. *Proceedings of the National Academy of Sciences*  
440 *of the United States of America*, **109**, 19310–4.
- 441 Forster, J., Hirst, A.G. & Woodward, G. (2011b) Growth and development rates have different  
442 thermal responses. *The American Naturalist*, **178**, 668–78.
- 443 Forster, J., Hirst, A.G. & Atkinson, D. (2011a) How do organisms change size with changing  
444 temperature? The importance of reproductive method and ontogenetic timing. *Functional*  
445 *Ecology*, **25**, 1024–1031.
- 446 Gilbert, B., Tunney, T.D., Mccann, K.S., Delong, J.P., Vasseur, D.A., Savage, V., Shurin, J.B.,  
447 Dell, A.I., Barton, B.T., Harley, C.D.G., Kharouba, H.M., Kratina, P., Blanchard, J.L.,  
448 Clements, C., Winder, M., Greig, H.S. & O'Connor, M.I. (2014) A bioenergetic framework  
449 for the temperature dependence of trophic interactions. *Ecology Letters*, **17**, 902–914.
- 450 Gillooly, J.F., Brown, J.H., West, G.B., Savage, V.M. & Charnov, E.L. (2001) Effects of size and  
451 temperature on metabolic rate. *Science*, **293**, 2248–51.
- 452 Holt, R.D. (1977) Predation, apparent competition, and the structure of prey communities.  
453 *Theoretical Population Biology*, **12**, 197–229.
- 454 Hurlbert, A.H. & Stegen, J.C. (2014) When should species richness be energy limited, and how  
455 would we know? *Ecology Letters*, **17**, 401–13.
- 456 Irlich, U.M., Terblanche, J.S., Blackburn, T.M. & Chown, S.L. (2009) Insect rate-temperature  
457 relationships: environmental variation and the metabolic theory of ecology. *The American*  
458 *Naturalist*, **174**, 819–835.
- 459 Kingsolver, J.G. & Huey, R.B. (2008) Size, temperature, and fitness: Three rules. *Evolutionary*  
460 *Ecology Research*, **10**, 251–268.
- 461 Kleiber, M. (1932) Body size and metabolism. *Hilgardia*, **6**, 315–351.
- 462 Lemoine, N.P. & Burkepile, D.E. (2012) Temperature-induced mismatches between consumption  
463 and metabolism reduce consumer fitness. *Ecology*, **93**, 2483–2489.
- 464 MacArthur, R.H. & Wilson, E.O. (1963) An Equilibrium Theory of Insular Zoogeography.  
465 *Evolution*, **17**, 373–387.

- 466 Makarieva, A.M., Gorshkov, V.G., Li, B.-L., Chown, S.L., Reich, P.B. & Gavrilov, V.M. (2008)  
467 Mean mass-specific metabolic rates are strikingly similar across life's major domains:  
468 Evidence for life's metabolic optimum. *Proceedings of the National Academy of Sciences of*  
469 *the United States of America*, **105**, 16994–16999.
- 470 Marquet, P., Labra, F. & Maurer, B. (2004) Metabolic ecology: linking individuals to  
471 ecosystems. *Ecology*, **85**, 1794–1796.
- 472 Marti, O.G. & Carpenter, J.E. (2008) Chemical Desilking of *Cactoblastic cactorum* Berg Pupae.  
473 *Journal of Entomological Science*, **43**, 344–347.
- 474 McIntyre, P.B., Flecker, A.S., Vanni, M.J., Hood, J.M., Taylor, B.W. & Thomas, S.A. (2008) Fish  
475 Distributions and Nutrient Cycling in Streams: Can Fish Create Biogeochemical Hotspots?  
476 *Ecology*, **89**, 2335–2346.
- 477 McNab, B.K. (2010) Geographic and temporal correlations of mammalian size reconsidered: a  
478 resource rule. *Oecologia*, **164**, 13–23.
- 479 O'Connor, M.P., Kemp, S.J., Agosta, S.J., Hansen, F., Sieg, A.E., Wallace, B.P., McNair, J.N. &  
480 Dunham, A.E. (2007) Reconsidering the mechanistic basis of the metabolic theory of  
481 ecology. *Oikos*, **116**, 1058–1072.
- 482 O'Gorman, E.J., Pichler, D.E., Adams, G., Benstead, J.P., Cohen, H., Craig, N., Cross, W.F.,  
483 Demars, B.O.L., Friberg, N., Gíslason, G.M., Gudmundsdóttir, R., Hawczak, A., Hood,  
484 J.M., Hudson, L.N., Johansson, L., Johansson, M.P., Junker, J.R., Laurila, A., Manson, J.R.,  
485 Mavromati, E., Nelson, D., Ólafsson, J.S., Perkins, D.M., Petchey, O.L., Plebani, M.,  
486 Reuman, D.C., Rall, B.C., Stewart, R., Thompson, M.S.A. & Woodward, G. (2012) *Impacts*  
487 *of Warming on the Structure and Functioning of Aquatic Communities: Individual- to*  
488 *Ecosystem-Level Responses. Advances in Ecological Research* (ed. by G. Woodward), U.  
489 Jacob, and E.J. O'Gorman), pp. 81–176. Elsevier.
- 490 O'Connor, M.I., Gilbert, B. & Brown, C.J. (2011) Theoretical Predictions for How Temperature  
491 Affects the Dynamics of Interacting Herbivores and Plants. *The American Naturalist*, **178**,  
492 626–638.
- 493 Oetken, M., Jagodzinski, L.S., Vogt, C., Jochum, A. & Oehlmann, J. (2009) Combined effects of  
494 chemical and temperature stress on *Chironomus riparius* populations with differing genetic  
495 variability. *Journal of Environmental Science and Health, Part A*, **44**, 955–962.
- 496 Ohlberger, J. (2013) Climate warming and ectotherm body size - from individual physiology to  
497 community ecology. *Functional Ecology*, **27**, 991–1001.
- 498 Olive, P.J.W. (1995) Annual breeding cycles in marine invertebrates and environmental  
499 temperature: Probing the proximate and ultimate causes of reproductive synchrony. *Journal*  
500 *of Thermal Biology*, **20**, 79–90.
- 501 Partridge, L. (1994) Evolution and Development of Body Size and Cell Size in *Drosophila*  
502 *melanogaster* in Response to Temperature. **48**, 1269–1276.
- 503 Pauly, D. (1980) On the Interrelationships between Natural Mortality, Growth Parameters, and  
504 Mean Environmental Temperature in 175 Fish Stocks. *Journal du Conseil*, **39**, 175–192.
- 505 Rall, B.C., Vucic-Pestic, O., Ehnes, R.B., Emmerson, M. & Brose, U. (2010) Temperature,  
506 predator-prey interaction strength and population stability. *Global Change Biology*, **16**,

- 507 2145–2157.
- 508 Schmidt-Nielsen, K. (1984) *Scaling: Why is animal size so important?*, Cambridge University  
509 Press, Cambridge.
- 510 Seebacher, F., White, C. & Franklin, C. (2015) Physiological plasticity increases resilience of  
511 ectothermic animals to climate change. *Nature Climate Change*, **5**, 61–66.
- 512 Stacey, D.A. & Fellowes, M.D.E. (2002) Temperature and the development rates of thrips:  
513 Evidence for a constraint on local adaptation? *European Journal of Entomology*, **99**, 399–  
514 404.
- 515 Sweeney, B.W. & Vannote, R.L. (1978) Size variation and the distribution of hemimetabolous  
516 aquatic insects: two thermal equilibrium hypotheses. *Science*, **200**, 444–446.
- 517 R Core Team (2016). R: A language and environment for statistical computing. R Foundation for  
518 Statistical Computing, Vienna, Austria. URL <https://www.R-project.org/>.
- 519 Voorhies, W. Van (1996) Bergmann Size Clines □: A Simple Explanation for Their Occurrence in  
520 Ectotherms. *Evolution*, **50**, 1259–1264.
- 521 Walters, R.J. & Hassall, M. (2006) The Temperature-Size Rule in ectotherms: May a general  
522 explanation exist after all? *The American Naturalist*, **167**, 510–523.
- 523 West, G.B., Brown, J.H. & Enquist, B.J. (1997) A general model for the origin of allometric  
524 scaling laws in biology. *Science*, **276**, 122–6.
- 525 White, C.R., Frappell, P.B. & Chown, S.L. (2012) An information-theoretic approach to  
526 evaluating the size and temperature dependence of metabolic rate. *Proceedings of the Royal  
527 Society B: Biological Sciences*, **279**, 3616–21.
- 528 Winter, B. (2013) Linear models and linear mixed effects models in R with linguistic  
529 applications. *arXiv:1308.5499*.
- 530 Wolkovich, E.M., Cook, B.I., Allen, J.M., Crimmins, T.M., Betancourt, J.L., Travers, S.E., Pau,  
531 S., Regetz, J., Davies, T.J., Kraft, N.J.B., Ault, T.R., Bolmgren, K., Mazer, S.J., McCabe,  
532 G.J., McGill, B.J., Parmesan, C., Salamin, N., Schwartz, M.D. & Cleland, E.E. (2012)  
533 Warming experiments underpredict plant phenological responses to climate change. *Nature*,  
534 **485**, 494–7.
- 535 Woodward, G., Ebenman, B., Emmerson, M., Montoya, J.M., Olesen, J.M., Valido, A. & Warren,  
536 P.H. (2005) Body size in ecological networks. *Trends in Ecology and Evolution*, **20**, 402–9.
- 537 Yvon-Durocher, G. & Allen, A.P. (2012) Linking community size structure and ecosystem  
538 functioning using metabolic theory. *Philosophical Transactions of the Royal Society B:  
539 Biological Sciences*, **367**, 2998–3007.

540

541

542

543

544

545

546

547 **FIGURES**  
548

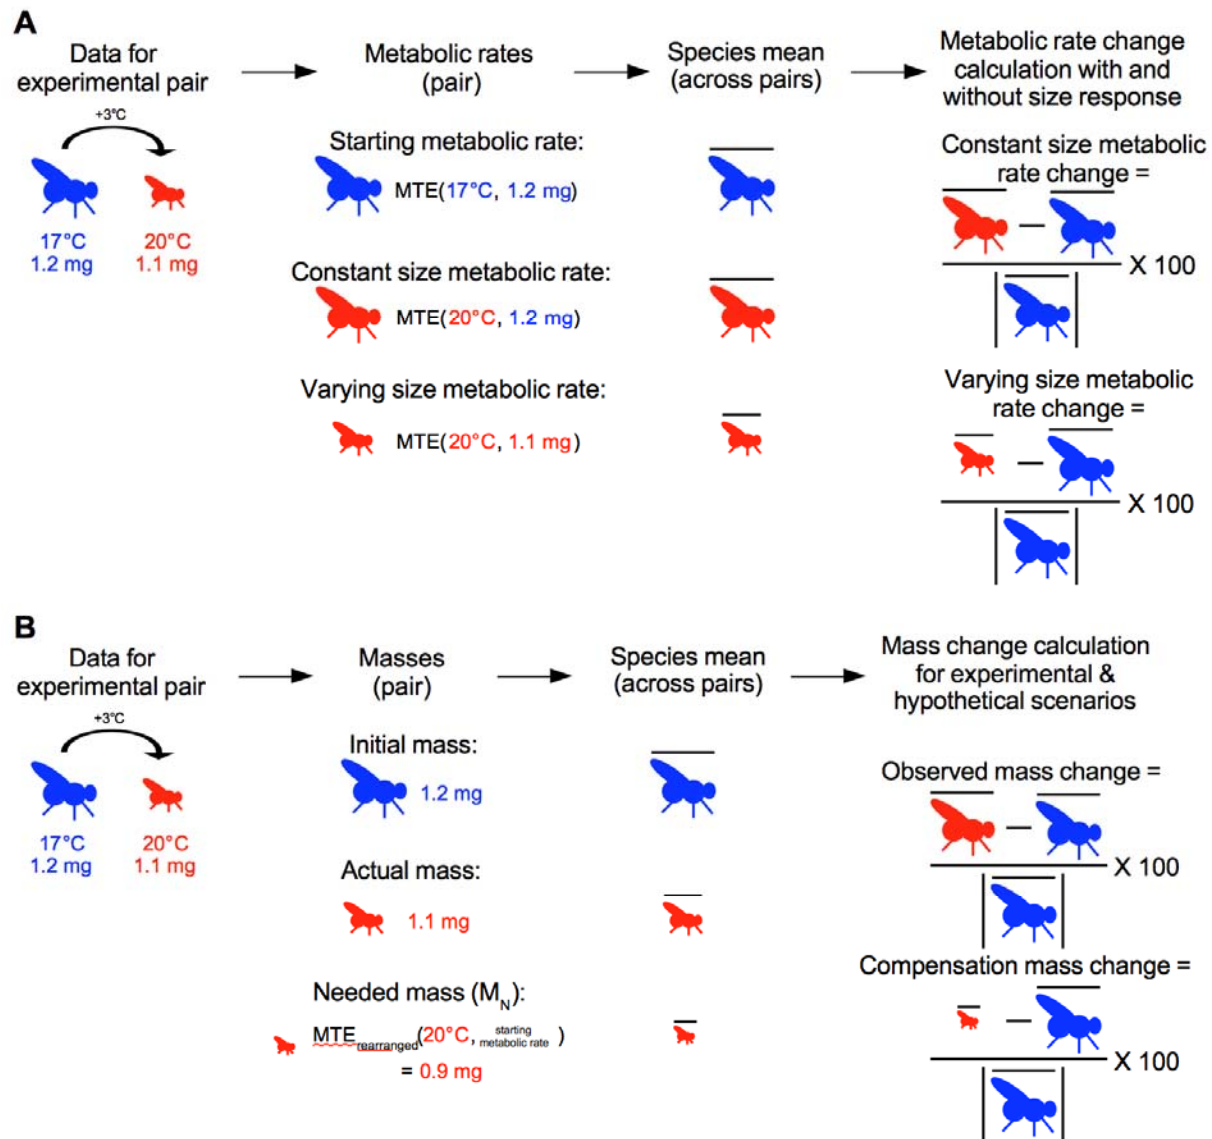

549  
550 Figure 1. Diagrams showing how the experimental data from the pairs were used to calculate  
551 constant size and varying size metabolic rate changes for each species (A), and how the data  
552 were used to calculate observed and compensation mass change for each species (B). The  
553 example data is from the species *Aedes aegypti*.

554  
555  
556  
557  
558  
559



Constant size metabolic rate change

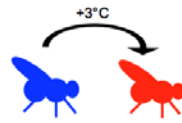

Varying size metabolic rate change

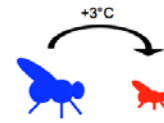

560

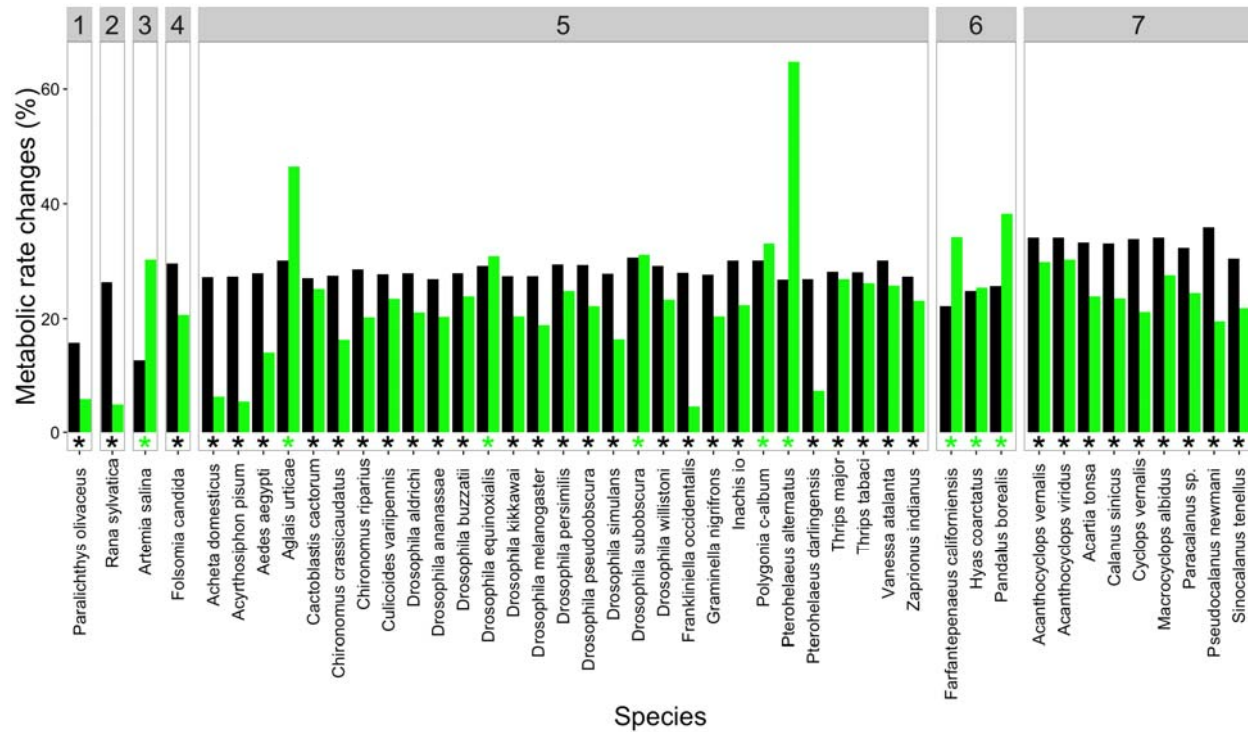

561

562 Figure 2. Constant size metabolic rate change (black bar) and varying size metabolic rate change  
 563 (green bar) for all species, represented as percent change from starting metabolic rate to  
 564 metabolic rate without the indirect effect of size response and to metabolic rate with indirect  
 565 effect, respectively. A positive percent difference indicates an increase from starting metabolic  
 566 rate. Asterisks are colored according to whether constant size metabolic rate (black asterisk) or  
 567 varying size metabolic rate (green asterisk) is larger for each species. Species are grouped by  
 568 class, with classes labelled at the top of the figure as follows: 1 = Actinoperygii, 2 = Amphibia, 3  
 569 = Branchiopoda, 4 = Entognatha, 5 = Insecta, 6 = Malacostraca, 7 = Maxillopoda.

570

571

572

573

574

575

576

577

578

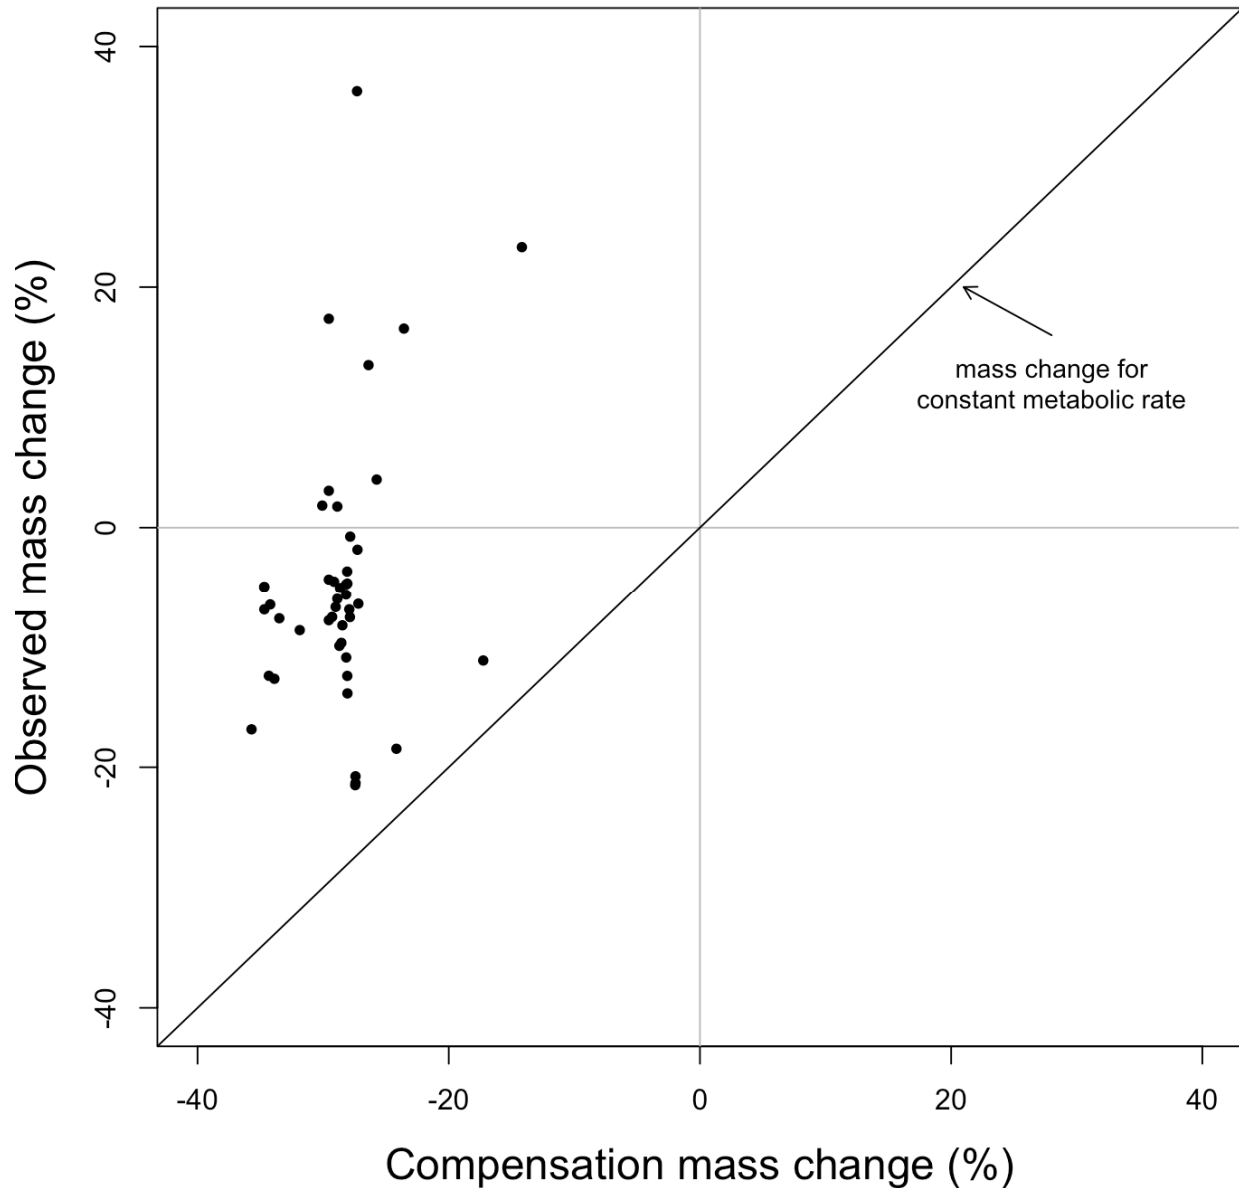

579

580 Figure 3. Comparison between compensation mass change and observed mass change for each  
581 species. Compensation mass change is the percent change from initial mass to needed mass (i.e.,  
582 mass change needed to maintain metabolic rate with increased temperature), while observed  
583 mass change is the percent change from initial mass to actual mass (i.e., observed mass change  
584 of individuals of each species raised experimentally). No change in mass and no change needed  
585 in mass are indicated by grey lines. Equivalence between needed mass and actual mass shown by  
586 black line.

587

588
